# Supplementary material for: Following Pediatric and Adult IBD Patients through the COVID-19 Pandemic: Changes in Psychosocial Burden and Perception of Infection Risk and Harm over Time
Source: MDPI journal article supplement (doi:10.3390/jcm10184124), 2021-09-13
Supplement: s1 [file s1]

Supplementary Information for:

**Following pediatric and adult IBD patients through the COVID-19 pandemic:  
changes in psychosocial burden and perception of  
infection risk and harm over time**

Leandra Koletzko, Elisabeth Klucker, Thu Giang Le Thi, Simone Breiteneicher,  
Raquel Rubio-Acero, Lukas Neuhaus, Renee Stark, Marie Standl, Michael Hölscher,  
Helga Török, Sibylle Koletzko and Tobias Schwerd

**The PDF file includes:**

|                         |                                                                                                           |
|-------------------------|-----------------------------------------------------------------------------------------------------------|
| Supplementary Figure S1 | Flow chart of participants in the cohort study                                                            |
| Supplementary Figure S2 | SIRSCO index                                                                                              |
| Supplementary Figure S3 | Matched PSQ of PIBD mothers and fathers as well as IBD patients                                           |
| Supplementary Figure S4 | Multivariable logistic regression based on second survey                                                  |
| Supplementary Figure S5 | Multivariable logistic regression patients aged 20 to 60 years of age                                     |
| Supplementary Table S1  | Patient characteristics of the total cohort (N=504) in four age groups (continued)                        |
| Supplementary Table S2  | Univariate analysis of factors associated with high perceived risk of acquiring COVID-19 infection, N=501 |
| Supplementary Table S3  | Univariate analysis of factors associated with high perceived harm in case of COVID-19 infection, N=501   |
| Supplementary Table S4  | Considered variables for multivariable logistic regression                                                |

## Supplementary Figure S1

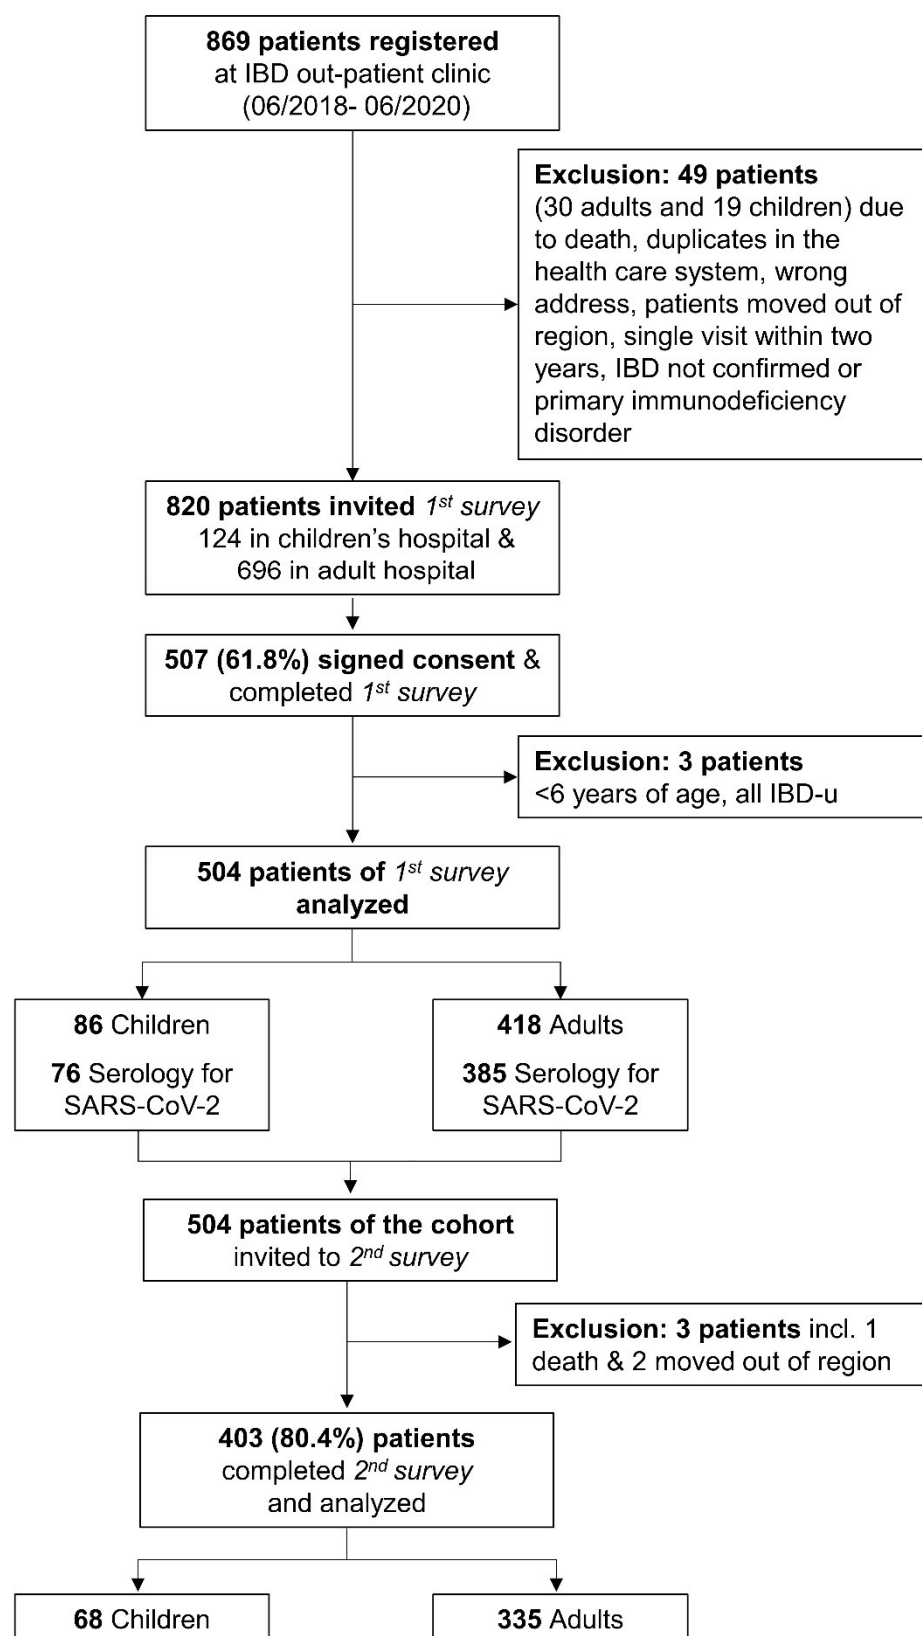

**Fig. S1:** Flow chart of participants in the first and second survey of the COVID-19 cohort study.

## Supplementary Figure S2

|                                                                                                                                                                                                                                                                                                                                                                                                                                                                                                          |  |                                                                                                      |
|----------------------------------------------------------------------------------------------------------------------------------------------------------------------------------------------------------------------------------------------------------------------------------------------------------------------------------------------------------------------------------------------------------------------------------------------------------------------------------------------------------|--|------------------------------------------------------------------------------------------------------|
| <b>I. High-risk comorbidities associated with severe COVID-19 illness:</b> <ol style="list-style-type: none"> <li>1. Diabetes (type I or type II)</li> <li>2. Chronic liver disease</li> <li>3. Chronic lung disease</li> <li>4. Chronic heart disease</li> <li>5. Arterial hypertension</li> <li>6. Rheumatic diseases</li> <li>7. Stroke</li> <li>8. Cancer</li> <li>9. Renal insufficiency</li> <li>10. Overweight / Obesity or BMI <math>\geq 30</math> kg/m<sup>2</sup></li> <li>11. HIV</li> </ol> |  | 1 point, if one comorbidity<br>2 points, if two comorbidities<br>3 points, if $\geq 3$ comorbidities |
| <b>II. Transplantation (organ, hematopoietic)</b>                                                                                                                                                                                                                                                                                                                                                                                                                                                        |  | + 2 points                                                                                           |
| <b>III. Treatment with any immunosuppressive medication including biologics, immunomodulator or steroids</b>                                                                                                                                                                                                                                                                                                                                                                                             |  | + 1 point                                                                                            |
| <b>IV. Age &gt;70 years</b>                                                                                                                                                                                                                                                                                                                                                                                                                                                                              |  | + 1 point                                                                                            |
| <b>SIRSCO Total Score:</b> <ul style="list-style-type: none"> <li>• 0 points, patient has <b>no increased risk</b>.</li> <li>• 1 point, patient has <b>mild risk</b>.</li> <li>• 2 points, patient has <b>moderate risk</b>.</li> <li>• 3-4 points, patient has <b>severe risk</b></li> <li>• <math>\geq 5</math> points, patient has <b>very severe risk</b>.</li> </ul>                                                                                                                                |  |                                                                                                      |

**Fig. S2: Scoring for increased risk for severe COVID-19 outcome SIRSCO index.** Based on information patients reported on their currently used medications, known comorbidities, weight and height, we calculated an individual risk score for severe illness from COVID-19. Comorbidities were selected based on information provided by the Robert Koch Institute, a public health institute in Germany ([www.rki.de](http://www.rki.de)). Chronic liver disease included autoimmune hepatitis, cholangitis (PSC) or other chronic liver disease, chronic lung disease included asthma, COPD, or other chronic lung diseases, chronic heart disease included coronary heart disease, heart insufficiency, cardiac arrhythmia or peripheral arterial disease. Other comorbidities reported by patients on skin allergy, psoriasis, allergies of the respiratory tract, autoimmune disease, other comorbidities / other chronic diseases were excluded in the consideration of high-risk comorbidities. Based on the total score, patients were stratified in 5 risk groups for severe illness from COVID-19.

### Supplementary Figure S3

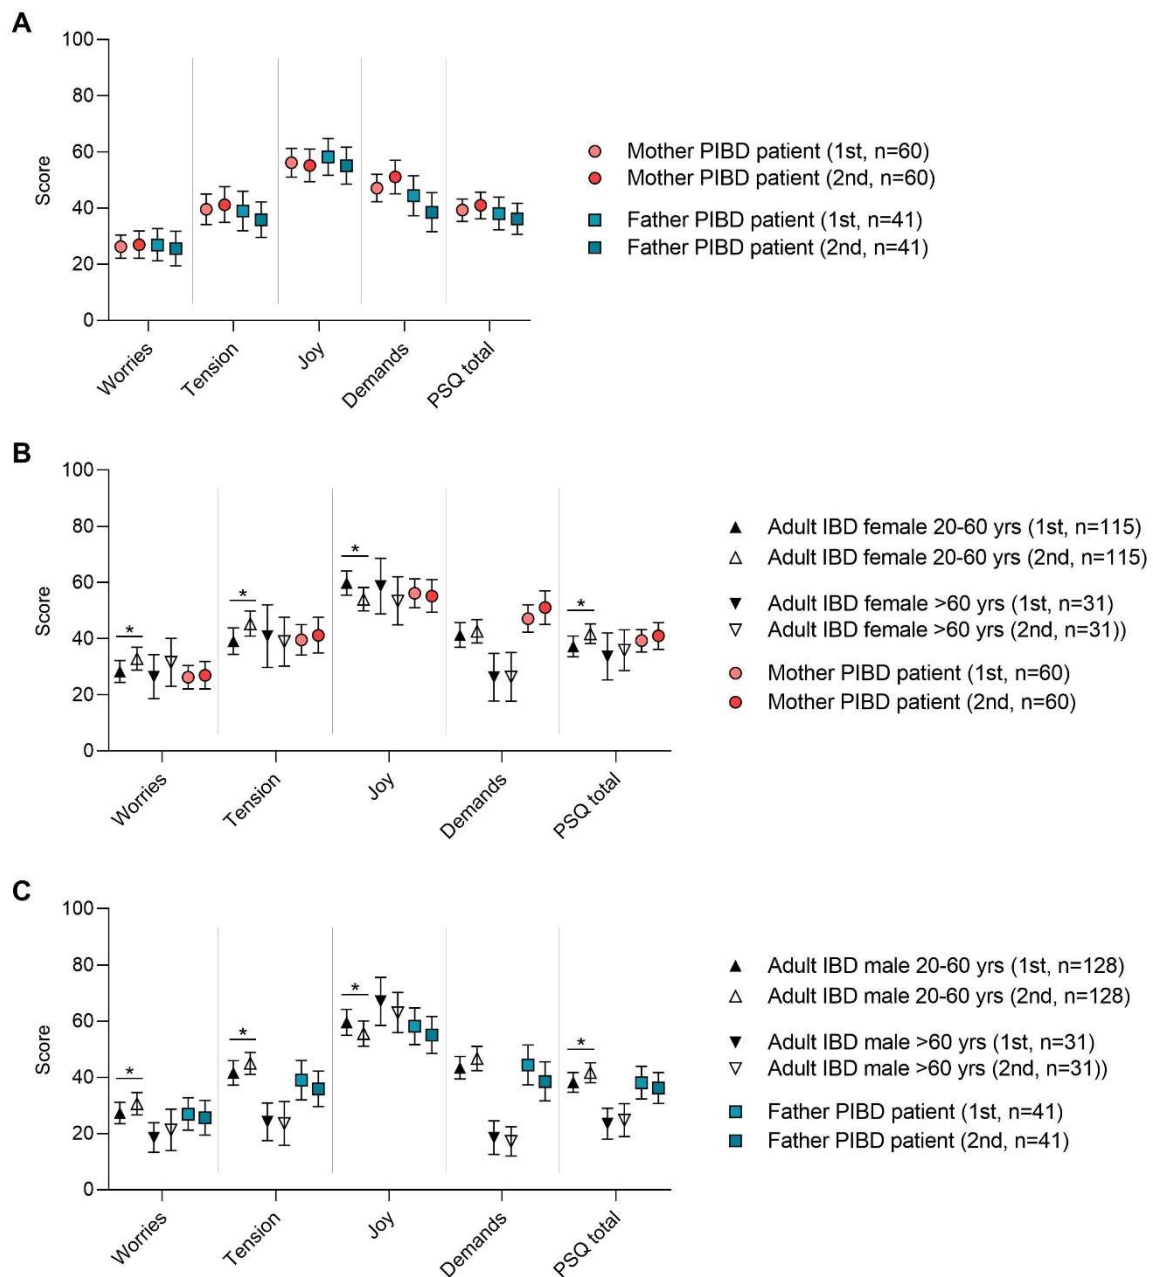

**Fig. S3** Perceived Stress Questionnaire (PSQ) in first (1<sup>st</sup>) and second (2<sup>nd</sup>) survey during the COVID-19 pandemic. Psychological stress was measured in adult IBD patients and in parents of pediatric IBD (PIBD) patients using the short version of the perceived stress questionnaire (PSQ). PSQ scores range 0-100 were given in mean and 95% confidence interval. A high score reflects a high degree of perceived stress (PSQ total), worries, tension, joy, or demands. Calculating total PSQ score, joy was transformed into “lack of joy”. Results are shown for mothers and fathers of PIBD patients (**A**) and for female (**B**) and male (**C**) IBD patients according to age groups from first (light colors and filled symbols) and second (dark colors and open symbols) survey. Mothers and fathers of PIBD patients are shown in relation to adult IBD patients (**B, C**).

## Supplementary Figure S4

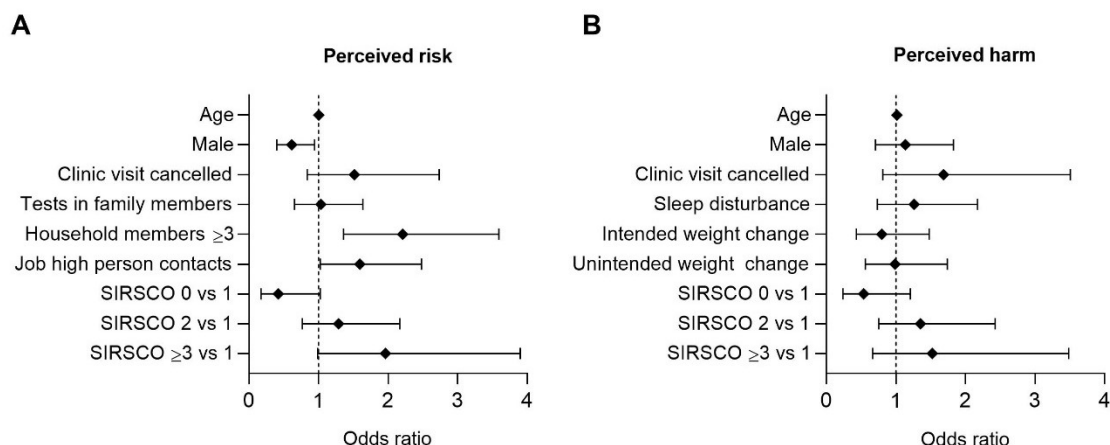

**Fig. S4:** Multivariable logistic regression of patients' **(A)** perceived risk to acquire COVID-19 ( $n = 387$ ) and **(B)** perceived harm in case of infection ( $n = 386$ ) in the second survey. SIRSCO (Scoring for increased risk for severe COVID-19 outcome) was described in Methods 2.3 and Figure S2. Mild risk with SIRSCO of 1 was performed as reference category. Other variables of the multivariable logistic regression were specified in Table S5. Odds ratios (OR) with 95% confidence intervals (95% CI) obtained from the multivariable logistic regression model are given.

## Supplementary Figure S5

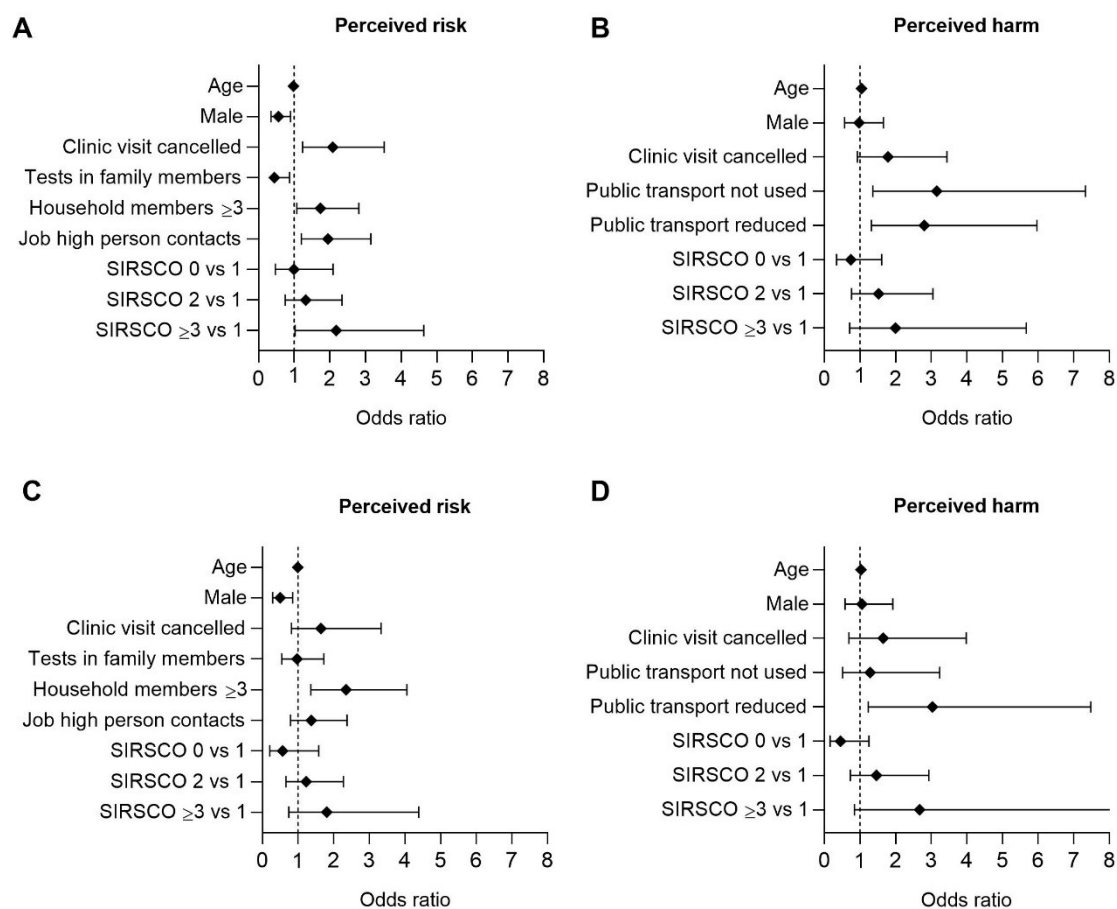

**Fig. S5:** Multivariable logistic regression of patients' (aged 20-60 years) perceived risk to acquire COVID-19 and perceived harm in case of infection in the first (**A and B**) and the second (**C and D**) survey. (**A**) Perceived risk, first survey (n=340). (**B**) Perceived harm, first survey (n=343). (**C**) Perceived risk, second survey (n=255). (**D**) Perceived harm, second survey (n=255). Patients between 20 to 60 years of age were included into the analysis. SIRSCO (Scoring for increased risk for severe COVID-19 outcome) was described in Methods 2.3 and Figure S2. Mild risk with SIRSCO of 1 was performed as reference category. Other variables of the multivariable logistic regression were specified in Table S5. Odds ratios (OR) with 95% confidence intervals (95% CI) obtained from the multivariable logistic regression model are given.

**Supplementary Table S1: Patient characteristics of the total cohort (N=504) in four age groups (continued)**

| Factors, n (%)                                                        | All patients<br>N=504<br>(100%) | 6 – 20 y<br>90<br>(18%) | >20 – 40 y<br>167<br>(33%) | >40 – 60 y<br>175<br>(35%) | >60 y<br>72<br>(14%) | p-value <sup>f</sup> |
|-----------------------------------------------------------------------|---------------------------------|-------------------------|----------------------------|----------------------------|----------------------|----------------------|
| <b>Country of birth, Germany</b>                                      | 451 (89.5)                      | 82 (91.1)               | 145 (86.8)                 | 157 (89.7)                 | 67 (93.1)            | 0.48                 |
| <b>Place of living, Munich</b>                                        | 175 (34.7)                      | 23 (25.6)               | 69 (41.3)                  | 59 (33.7)                  | 24 (33.3)            | 0.083                |
| <b>Smoking &gt;1 year/lifetime</b>                                    | 221 (45.9)                      | 10 (14.7)               | 62 (37.1)                  | 104 (59.8)                 | 45 (62.5)            | <b>&lt;0.001</b>     |
| <b>First degree relative with IBD</b>                                 | 67 (13.3)                       | 14 (15.6)               | 22 (13.2)                  | 22 (12.6)                  | 9 (12.5)             | 0.98                 |
| <b>Crohn's disease phenotype<sup>a</sup>, N=290</b>                   |                                 |                         |                            |                            |                      | 0.34                 |
| L1 ileo-cecal                                                         | 63 (21.7)                       | 5 (11.6)                | 23 (23.7)                  | 25 (22.9)                  | 10 (24.4)            |                      |
| L2 colonic                                                            | 42 (14.5)                       | 3 (7.0)                 | 16 (16.5)                  | 20 (18.3)                  | 3 (7.3)              |                      |
| L3 Ileo-colonic                                                       | 160 (55.2)                      | 30 (69.8)               | 50 (51.5)                  | 55 (50.5)                  | 25 (61.0)            |                      |
| L4 only (upper GI incl. jejunum)                                      | 25 (8.6)                        | 5 (11.6)                | 8 (8.3)                    | 9 (8.3)                    | 3 (7.3)              |                      |
| <b>B2 stricturing disease<sup>b</sup>, N=295</b>                      | 66 (22.4)                       | 6 (13.6)                | 20 (20.0)                  | 28 (25.7)                  | 12 (28.6)            | 0.46                 |
| <b>Perianal involvement<sup>c</sup>, N=295</b>                        | 135 (45.8)                      | 16 (36.4)               | 49 (49.0)                  | 55 (50.5)                  | 15 (35.7)            | 0.13                 |
| <b>Ulcerative colitis phenotype<sup>d</sup>, N=142</b>                |                                 |                         |                            |                            |                      | 0.16                 |
| E1 Proctitis                                                          | 20 (14.1)                       | 3 (12.0)                | 3 (6.5)                    | 8 (17.0)                   | 6 (25.0)             |                      |
| E2 Left sided                                                         | 23 (16.2)                       | 1 (4.0)                 | 8 (17.4)                   | 9 (19.2)                   | 5 (20.8)             |                      |
| E3 Extensive                                                          | 99 (69.7)                       | 21 (84.0)               | 35 (76.1)                  | 30 (63.8)                  | 13 (54.2)            |                      |
| <b>Co-morbidities with increased risk for severe COVID-19 outcome</b> |                                 |                         |                            |                            |                      |                      |
| Diabetes (Type I or Type II), N=504                                   | 27 (5.4)                        | 2 (2.2)                 | 0 (0.0)                    | 15 (8.6)                   | 10 (13.9)            | <b>&lt;0.001</b>     |
| Chronic lung disease, N=504                                           | 47 (9.3)                        | 8 (8.9)                 | 12 (7.2)                   | 15 (8.6)                   | 12 (16.7)            | 0.13                 |
| Chronic liver disease, N=504                                          | 45 (8.9)                        | 6 (6.7)                 | 13 (7.8)                   | 21 (12.0)                  | 5 (6.9)              | 0.36                 |
| Chronic heart disease, N=418                                          | 19 (4.6)                        | 0 (0.0)                 | 1 (0.6)                    | 4 (2.3)                    | 14 (19.4)            | <b>&lt;0.001</b>     |
| Arterial hypertension, N=418                                          | 71 (17.0)                       | 0 (0.0)                 | 6 (3.6)                    | 37 (21.1)                  | 28 (38.9)            | <b>&lt;0.001</b>     |
| Renal insufficiency, N=418                                            | 19 (4.5)                        | 0 (0.0)                 | 5 (3.0)                    | 9 (5.1)                    | 5 (6.9)              | 0.53                 |
| Rheumatic disease, N=418                                              | 47 (11.2)                       | 0 (0.0)                 | 7 (4.2)                    | 21 (12.0)                  | 19 (26.4)            | <b>&lt;0.001</b>     |
| Stroke, N=418                                                         | 5 (1.2)                         | 0 (0.0)                 | 1 (0.6)                    | 1 (0.6)                    | 3 (4.2)              | 0.089                |
| Malignancy, N=418                                                     | 15 (3.6)                        | 0 (0.0)                 | 4 (2.4)                    | 3 (1.7)                    | 8 (11.1)             | <b>0.002</b>         |
| Obesity BMI ≥ 30 kg/m <sup>2</sup> , N=504                            | 58 (11.5)                       | 1 (1.1)                 | 14 (8.4)                   | 33 (18.9)                  | 10 (13.9)            | <b>0.0001</b>        |
| <b>Categories of high-risk comorbidity, N=504</b>                     |                                 |                         |                            |                            |                      | <b>&lt;0.0001</b>    |
| None                                                                  | 290 (57.5)                      | 73 (81.1)               | 116 (69.5)                 | 82 (46.9)                  | 19 (26.4)            |                      |
| One high-risk comorbidity                                             | 132 (26.2)                      | 17 (18.9)               | 41 (24.5)                  | 54 (30.9)                  | 20 (27.8)            |                      |
| Two high-risk comorbidities                                           | 46 (9.1)                        | 0 (0.0)                 | 8 (4.8)                    | 23 (13.1)                  | 15 (20.8)            |                      |
| ≥3 high-risk comorbidities                                            | 36 (7.1)                        | 0 (0.0)                 | 2 (1.2)                    | 16 (9.1)                   | 18 (25.0)            |                      |
| <b>Transplantation (organ, hematopoietic stem cell), N=504</b>        | 9 (1.8)                         | 0 (0.0)                 | 1 (0.6)                    | 5 (2.9)                    | 3 (4.2)              | 0.092                |

Results were presented in frequency (n) and column percentage (%).

<sup>a b c d e</sup> Phenotypes were categorized based on self-assessment of participants on IBD disease course.

<sup>f</sup> P-values obtained from Pearson's Chi-square test or Fisher's exact test as appropriate.

Bold p-values indicate significant differences in the proportion of respective factors in 4 age groups with a p-value <0.05.

**Supplementary Table S2: Univariate analysis of factors associated with high perceived risk of acquiring COVID-19 infection, N=501**

| Factors, N (row %)                          | Total cohort,<br>N=501 | Low perceived risk<br>(rating ≤ 3)<br>n=320 (64%) | High perceived risk<br>(rating > 3)<br>n=181 (36%) | p-value <sup>a</sup> | Crude OR (95%CI)   | p-value <sup>b</sup> | OR adjusted for age<br>and gender (95%CI) | p-value <sup>c</sup> |
|---------------------------------------------|------------------------|---------------------------------------------------|----------------------------------------------------|----------------------|--------------------|----------------------|-------------------------------------------|----------------------|
| <b>Age in years, median (IQR)</b>           | 40 (27-54)             | 41 (26-56)                                        | 38 (28-50)                                         | <b>&lt;0.001</b>     | 0.98 (0.98 - 0.99) | <b>&lt;0.0001</b>    |                                           |                      |
| <b>Age groups</b>                           |                        |                                                   |                                                    | <b>0.006</b>         |                    |                      |                                           |                      |
| 6 – 20                                      | 90                     | 61 (68%)                                          | 29 (32%)                                           |                      | 1.94 (1.13 – 3.28) | <b>0.01</b>          |                                           |                      |
| >20 – 40                                    | 167                    | 96 (57%)                                          | 71 (43%)                                           |                      | 3.01 (2.1 - 4.36)  | <b>&lt;0.0001</b>    |                                           |                      |
| >40 – 60                                    | 173                    | 106 (61%)                                         | 67 (39%)                                           |                      | 2.57 (1.84 - 3.65) | <b>&lt;0.0001</b>    |                                           |                      |
| >60                                         | 71                     | 57 (80%)                                          | 14 (20%)                                           |                      | 1                  |                      |                                           |                      |
| <b>Gender</b>                               |                        |                                                   |                                                    | <b>0.004</b>         |                    |                      |                                           |                      |
| Female                                      | 231                    | 132 (58%)                                         | 99 (43%)                                           |                      | 1                  |                      |                                           |                      |
| Male                                        | 270                    | 188 (70%)                                         | 82 (31%)                                           |                      | 0.58 (0.42 - 0.8)  | <b>0.0009</b>        |                                           |                      |
| <b>Living in Munich</b>                     |                        |                                                   |                                                    | 0.45                 |                    |                      |                                           |                      |
| Yes                                         | 174                    | 115 (66%)                                         | 59 (34%)                                           |                      | 1                  |                      | 1                                         |                      |
| No                                          | 327                    | 205 (63%)                                         | 122 (37%)                                          |                      | 1.16 (0.82 - 1.66) | 0.41                 | 1.16 (0.82 - 1.67)                        | 0.40                 |
| <b>Housing space per person</b>             |                        |                                                   |                                                    | <b>0.015</b>         |                    |                      |                                           |                      |
| ≤30m2 - small space                         | 140                    | 87 (62%)                                          | 53 (38%)                                           |                      | 1                  |                      | 1                                         |                      |
| 30m2 to 55m2 – medium space                 | 239                    | 141 (59%)                                         | 98 (41%)                                           |                      | 1.14 (0.78 - 1.69) | 0.50                 | 1.13 (0.76 - 1.68)                        | 0.55                 |
| >55m2 - large space                         | 118                    | 88 (75%)                                          | 30 (25%)                                           |                      | 0.56 (0.37 - 0.85) | <b>0.006</b>         | 0.61 (0.40 - 0.94)                        | <b>0.02</b>          |
| <b>Number of household members</b>          |                        |                                                   |                                                    | <b>0.009</b>         |                    |                      |                                           |                      |
| 1 or 2                                      | 254                    | 176 (69%)                                         | 78 (31%)                                           |                      | 1                  |                      | 1                                         |                      |
| ≥3                                          | 245                    | 142 (58%)                                         | 103 (42%)                                          |                      | 1.64 (1.19 - 2.26) | <b>0.003</b>         | 1.68 (1.19 - 2.40)                        | <b>0.004</b>         |
| <b>Employment status</b>                    |                        |                                                   |                                                    | 0.12                 |                    |                      |                                           |                      |
| Employed                                    | 314                    | 186 (59%)                                         | 128 (41%)                                          |                      | 1.73 (1.23 - 2.45) | <b>0.002</b>         | 1.51 (1.03 – 2.21)                        | <b>0.03</b>          |
| Self-employed                               | 31                     | 22 (71%)                                          | 9 (29%)                                            |                      | 1.03 (0.55 - 1.86) | 0.92                 | 1.09 (0.57 – 2.02)                        | 0.79                 |
| Not working                                 | 95                     | 68 (72%)                                          | 27 (28%)                                           |                      | 1                  |                      | 1                                         |                      |
| <b>Net income per household</b>             |                        |                                                   |                                                    | 0.75                 |                    |                      |                                           |                      |
| ≤2500 €                                     | 105                    | 62 (59%)                                          | 43 (41%)                                           |                      | 1.28 (0.81 - 2.02) | 0.28                 | 1.28 (0.80 – 2.03)                        | 0.31                 |
| 2500 to 4000 €                              | 109                    | 71 (65%)                                          | 38 (35%)                                           |                      | 0.99 (0.69 - 1.43) | 0.96                 | 1.02 (0.70 – 1.47)                        | 0.94                 |
| 4000 to 6000 €                              | 114                    | 69 (61%)                                          | 45 (39%)                                           |                      | 1.21 (0.88 - 1.66) | 0.25                 | 1.30 (0.94 – 1.79)                        | 0.12                 |
| >6000 €                                     | 77                     | 50 (65%)                                          | 27 (35%)                                           |                      | 1                  |                      | 1                                         |                      |
| <b>Level of education</b>                   |                        |                                                   |                                                    | 0.19                 |                    |                      |                                           |                      |
| <12 years education                         | 201                    | 136 (68%)                                         | 65 (32%)                                           |                      | 1                  |                      | 1                                         |                      |
| ≥12 years education                         | 283                    | 175 (62%)                                         | 108 (38%)                                          |                      | 1.29 (0.92 - 1.82) | 0.14                 | 1.25 (0.88 – 1.80)                        | 0.22                 |
| <b>High-risk job for COVID-19 infection</b> |                        |                                                   |                                                    | <b>0.0002</b>        |                    |                      |                                           |                      |
| Yes                                         | 209                    | 114 (55%)                                         | 95 (45%)                                           |                      | 1.99 (1.44 - 2.76) | <b>&lt;0.0001</b>    | 1.88 (1.35 – 2.61)                        | <b>0.0002</b>        |
| No                                          | 292                    | 206 (71%)                                         | 86 (29%)                                           |                      | 1                  |                      | 1                                         |                      |
| <b>Public transport usage reduced</b>       |                        |                                                   |                                                    | 0.07                 |                    |                      |                                           |                      |
| No                                          | 59                     | 43 (73%)                                          | 16 (27%)                                           |                      | 1                  |                      | 1                                         |                      |
| Yes                                         | 291                    | 174 (60%)                                         | 117 (40%)                                          |                      | 1.81 (1.01 - 3.38) | <b>0.05</b>          | 1.71 (0.95 – 3.21)                        | 0.08                 |
| Does not apply to me                        | 148                    | 101 (68%)                                         | 47 (32%)                                           |                      | 1.25 (0.69 - 2.36) | 0.47                 | 1.21 (0.67 – 2.29)                        | 0.55                 |

| Factors, N (row %)                                                          | Total cohort,<br>N=501 | Low perceived risk<br>(rating ≤ 3)<br>n=320 (64%) | High perceived risk<br>(rating > 3)<br>n=181 (36%) | p-value <sup>a</sup> | Crude OR (95%CI)   | p-value <sup>b</sup> | OR adjusted for age<br>and gender (95%CI) | p-value <sup>c</sup> |
|-----------------------------------------------------------------------------|------------------------|---------------------------------------------------|----------------------------------------------------|----------------------|--------------------|----------------------|-------------------------------------------|----------------------|
| <b>Temporary incapacity to work since 3/20</b>                              |                        |                                                   |                                                    | <b>0.007</b>         |                    |                      |                                           |                      |
| No                                                                          | 304                    | 203 (67%)                                         | 101 (33%)                                          |                      | 1                  |                      | 1                                         |                      |
| Yes, due to IBD or other reasons                                            | 111                    | 58 (52%)                                          | 53 (48%)                                           |                      | 1.84 (1.22 - 2.77) | <b>0.004</b>         | 1.80 (1.18 – 2.74)                        | <b>0.006</b>         |
| <b>BMI</b>                                                                  |                        |                                                   |                                                    | 0.16                 |                    |                      |                                           |                      |
| Underweight                                                                 | 40                     | 25 (62%)                                          | 15 (38%)                                           |                      | 1.19 (0.6 - 2.29)  | 0.60                 | 1.00 (0.50 – 1.94)                        | 0.99                 |
| Normal weight                                                               | 275                    | 183 (67%)                                         | 92 (33%)                                           |                      | 1                  |                      | 1                                         |                      |
| Overweight                                                                  | 128                    | 83 (65%)                                          | 45 (35%)                                           |                      | 1.08 (0.82 - 1.42) | 0.59                 | 1.31 (0.98 – 1.76)                        | <b>0.07</b>          |
| Obesity                                                                     | 57                     | 29 (51%)                                          | 28 (49%)                                           |                      | 1.92 (1.4 - 2.63)  | <b>&lt;0.0001</b>    | 2.22 (1.59 – 3.10)                        | <b>&lt;0.0001</b>    |
| <b>IBD Type</b>                                                             |                        |                                                   |                                                    | 0.41                 |                    |                      |                                           |                      |
| Crohn's Disease                                                             | 295                    | 183 (62%)                                         | 112 (38%)                                          |                      | 1.17 (0.86 - 1.6)  | 0.33                 | 1.13 (0.82 – 1.56)                        | 0.45                 |
| Ulcerative Colitis / IBD-u                                                  | 198                    | 130 (66%)                                         | 68 (34%)                                           |                      | 1                  |                      | 1                                         |                      |
| <b>Disease activity (self-assessment)</b>                                   |                        |                                                   |                                                    | 0.23                 |                    |                      |                                           |                      |
| Remission                                                                   | 228                    | 146 (64%)                                         | 82 (36%)                                           |                      | 1                  |                      | 1                                         |                      |
| Mild activity                                                               | 197                    | 120 (61%)                                         | 77 (39%)                                           |                      | 1.14 (0.82 - 1.61) | 0.44                 | 1.16 (0.83 – 1.64)                        | 0.39                 |
| Moderate / severe activity                                                  | 75                     | 54 (72%)                                          | 21 (28%)                                           |                      | 0.69 (0.46 - 1.03) | 0.07                 | 0.75 (0.50 – 1.13)                        | 0.17                 |
| <b>Duration of IBD (to 2020)</b>                                            |                        |                                                   |                                                    | 0.66                 |                    |                      |                                           |                      |
| 0 to 5 years                                                                | 126                    | 86 (68%)                                          | 40 (32%)                                           |                      | 1                  |                      | 1                                         |                      |
| 6 to 10 years                                                               | 93                     | 56 (60%)                                          | 37 (40%)                                           |                      | 1.42 (0.89 - 2.3)  | 0.15                 | 1.64 (1.01 – 2.69)                        | <b>0.049</b>         |
| 11 to 20 years                                                              | 147                    | 94 (64%)                                          | 53 (36%)                                           |                      | 1.21 (0.8 - 1.86)  | 0.37                 | 1.80 (1.15 – 2.88)                        | <b>0.01</b>          |
| over 20 years                                                               | 122                    | 77 (63%)                                          | 45 (37%)                                           |                      | 1.26 (0.83 - 1.92) | 0.28                 | 2.59 (1.57 – 4.37)                        | <b>0.0003</b>        |
| <b>Influenza vaccination</b>                                                |                        |                                                   |                                                    | 0.49                 |                    |                      |                                           |                      |
| Yes                                                                         | 203                    | 133 (66%)                                         | 70 (34%)                                           |                      | 0.88 (0.63 - 1.22) | 0.44                 | 0.85 (0.60 – 1.20)                        | 0.36                 |
| No                                                                          | 293                    | 183 (62%)                                         | 110 (38%)                                          |                      | 1                  |                      | 1                                         |                      |
| <b>Any immunosuppressive medications used incl. IM, biologics, steroids</b> |                        |                                                   |                                                    | 0.26                 |                    |                      |                                           |                      |
| Yes                                                                         | 399                    | 250 (63%)                                         | 149 (37%)                                          |                      | 1.3 (0.91 - 1.87)  | 0.15                 | 1.37 (0.96 – 1.99)                        | 0.09                 |
| No                                                                          | 102                    | 70 (69%)                                          | 32 (31%)                                           |                      | 1                  |                      | 1                                         |                      |
| <b>Infliximab (i.e., Remicade, Remsima, Flixabi, Inflectra, Zessly)</b>     |                        |                                                   |                                                    | 0.29                 |                    |                      |                                           |                      |
| Yes                                                                         | 165                    | 100 (61%)                                         | 65 (39%)                                           |                      | 1.23 (0.87 - 1.75) | 0.24                 | 1.25 (0.87 - 1.79)                        | 0.22                 |
| No                                                                          | 336                    | 220 (65%)                                         | 116 (35%)                                          |                      | 1                  |                      | 1                                         |                      |
| <b>High-risk comorbidity</b>                                                |                        |                                                   |                                                    | 0.34                 |                    |                      |                                           |                      |
| No high-risk comorbidity                                                    | 289                    | 188 (65%)                                         | 101 (35%)                                          |                      | 1                  |                      | 1                                         |                      |
| One high-risk comorbidity                                                   | 132                    | 88 (67%)                                          | 44 (33%)                                           |                      | 0.93 (0.65 - 1.32) | 0.69                 | 1.10 (0.76 - 1.59)                        | 0.61                 |
| Two high-risk comorbidities                                                 | 45                     | 25 (56%)                                          | 20 (44%)                                           |                      | 1.49 (0.98 - 2.26) | 0.06                 | 2.21 (1.39 - 3.53)                        | <b>0.0008</b>        |
| ≥3 high-risk comorbidities                                                  | 35                     | 19 (54%)                                          | 16 (46%)                                           |                      | 1.57 (1.04 - 2.37) | <b>0.03</b>          | 2.84 (1.73 - 4.70)                        | <b>&lt;0.0001</b>    |
| <b>SIRSCO<sup>d</sup> index for severe COVID-19</b>                         |                        |                                                   |                                                    | 0.59                 |                    |                      |                                           |                      |
| 0= no increased risk                                                        | 58                     | 40 (69%)                                          | 18 (31%)                                           |                      | 0.83 (0.45 – 1.48) | 0.54                 | 0.72 (0.39 – 1.29)                        | 0.28                 |
| 1= mild risk                                                                | 248                    | 161 (65%)                                         | 87 (35%)                                           |                      | 1                  |                      | 1                                         |                      |
| 2= moderate risk                                                            | 116                    | 73 (63%)                                          | 43 (37%)                                           |                      | 1.09 (0.82 – 1.45) | 0.55                 | 1.24 (0.92 – 1.68)                        | 0.16                 |
| ≥3= severe to very severe risk                                              | 79                     | 46 (58%)                                          | 33 (42%)                                           |                      | 1.33 (0.99 – 1.77) | 0.06                 | 2.23 (1.57 – 3.18)                        | <b>&lt;0.0001</b>    |
| <b>Sleep disturbances</b>                                                   |                        |                                                   |                                                    | 0.43                 |                    |                      |                                           |                      |
| Yes                                                                         | 112                    | 68 (61%)                                          | 44 (39%)                                           |                      | 1.19 (0.79 – 1.78) | 0.40                 | 1.17 (0.77 – 1.76)                        | 0.46                 |
| No                                                                          | 386                    | 250 (65%)                                         | 136 (35%)                                          |                      | 1                  |                      | 1                                         |                      |

| Factors, N (row %)                                                                                   | Total cohort,<br>N=501 | Low perceived risk<br>(rating ≤ 3)<br>n=320 (64%) | High perceived risk<br>(rating > 3)<br>n=181 (36%) | p-value <sup>a</sup> | Crude OR (95%CI)    | p-value <sup>b</sup> | OR adjusted for age<br>and gender (95%CI) | p-value <sup>c</sup> |
|------------------------------------------------------------------------------------------------------|------------------------|---------------------------------------------------|----------------------------------------------------|----------------------|---------------------|----------------------|-------------------------------------------|----------------------|
| <b>Weight change</b>                                                                                 |                        |                                                   |                                                    | <b>0.02</b>          |                     |                      |                                           |                      |
| Yes, intended                                                                                        | 71                     | 42 (59%)                                          | 29 (41%)                                           |                      | 1.54 (0.93 – 2.51)  | 0.09                 | 1.51 (0.90 – 2.50)                        | 0.11                 |
| Yes, unintended                                                                                      | 135                    | 75 (56%)                                          | 60 (44%)                                           |                      | 1.79 (1.35 – 2.36)  | <b>&lt;.0001</b>     | 1.82 (1.37 – 2.41)                        | <b>&lt;0.0001</b>    |
| Unchanged                                                                                            | 294                    | 203 (69%)                                         | 91 (31%)                                           |                      | 1                   |                      | 1                                         |                      |
| <b>Food intake</b>                                                                                   |                        |                                                   |                                                    | <b>0.02</b>          |                     |                      |                                           |                      |
| More                                                                                                 | 72                     | 36 (50%)                                          | 36 (50%)                                           |                      | 2.04 (1.25 – 3.32)  | <b>0.004</b>         | 1.91 (1.17 – 3.13)                        | <b>0.009</b>         |
| Unchanged                                                                                            | 395                    | 265 (67%)                                         | 130 (33%)                                          |                      | 1                   |                      | 1                                         |                      |
| Less                                                                                                 | 33                     | 19 (58%)                                          | 14 (42%)                                           |                      | 1.5 (0.98 – 2.29)   | 0.06                 | 1.36 (0.88 – 2.09)                        | 0.16                 |
| <b>COVID-19 PCR for patient</b>                                                                      |                        |                                                   |                                                    | 0.62                 |                     |                      |                                           |                      |
| Yes                                                                                                  | 117                    | 77 (66%)                                          | 40 (34%)                                           |                      | 0.9 (0.59 – 1.34)   | 0.60                 | 0.83 (0.54 – 1.26)                        | 0.39                 |
| No                                                                                                   | 384                    | 243 (63%)                                         | 141 (37%)                                          |                      | 1                   |                      | 1                                         |                      |
| <b>COVID-19 PCR for family member</b>                                                                |                        |                                                   |                                                    | 0.37                 |                     |                      |                                           |                      |
| Yes                                                                                                  | 99                     | 67 (68%)                                          | 32 (32%)                                           |                      | 0.81 (0.51 – 1.25)  | 0.34                 | 0.74 (0.47 – 1.16)                        | 0.20                 |
| No                                                                                                   | 398                    | 250 (63%)                                         | 148 (37%)                                          |                      | 1                   |                      | 1                                         |                      |
| <b>Appointment declined by hospital</b>                                                              |                        |                                                   |                                                    | 0.17                 |                     |                      |                                           |                      |
| Yes, at least once                                                                                   | 46                     | 24 (52%)                                          | 22 (48%)                                           |                      | 1.61 (0.88 – 2.95)  | 0.12                 | 1.68 (0.91 – 3.10)                        | 0.09                 |
| No, I could schedule all requested appointments                                                      | 323                    | 206 (64%)                                         | 117 (36%)                                          |                      | 1                   |                      | 1                                         |                      |
| I haven't asked for new appointment                                                                  | 130                    | 88 (68%)                                          | 42 (32%)                                           |                      | 0.84 (0.64 – 1.1)   | 0.20                 | 0.83 (0.63 – 1.08)                        | 0.16                 |
| <b>Appointment postponed</b>                                                                         |                        |                                                   |                                                    | <b>0.004</b>         |                     |                      |                                           |                      |
| Yes                                                                                                  | 133                    | 71 (53%)                                          | 62 (47%)                                           |                      | 1.82 (1.25 – 2.65)  | <b>0.002</b>         | 1.79 (1.22 – 2.62)                        | <b>0.003</b>         |
| No (all reasons)                                                                                     | 367                    | 248 (68%)                                         | 119 (32%)                                          |                      | 1                   |                      | 1                                         |                      |
| <b>Interest in future telemedicine</b>                                                               |                        |                                                   |                                                    | 0.79                 |                     |                      |                                           |                      |
| Yes                                                                                                  | 247                    | 157 (64%)                                         | 90 (36%)                                           |                      | 1.05 (0.76 – 1.44)  | 0.76                 | 1.05 (0.76 – 1.44)                        | 0.78                 |
| No                                                                                                   | 252                    | 163 (65%)                                         | 89 (35%)                                           |                      | 1                   |                      | 1                                         |                      |
| <b>Quality of life obtained in pediatric patients with Impact III Questionnaire, mean (SD), N=66</b> |                        |                                                   |                                                    |                      |                     |                      |                                           |                      |
| Impact III total score                                                                               | 76 (10)                | 77 (10)                                           | 73 (10)                                            | 0.09                 | 0.97 (0.92 - 1.02)  | 0.19                 | 0.97 (0.92 - 1.02)                        | 0.26                 |
| Impact III well being                                                                                | 77 (14)                | 78 (14)                                           | 74 (13)                                            | 0.18                 | 0.98 (0.94 - 1.02)  | 0.28                 | 0.99 (0.95 - 1.02)                        | 0.42                 |
| Impact III emotion                                                                                   | 63 (18)                | 65 (18)                                           | 61 (16)                                            | 0.44                 | 0.99 (0.96 - 1.02)  | 0.45                 | 0.99 (0.95 - 1.02)                        | 0.36                 |
| Impact III social                                                                                    | 87 (11)                | 89 (10)                                           | 82 (11)                                            | <b>0.02</b>          | 0.95 (0.90 - 0.99)  | <b>0.03</b>          | 0.95 (0.9 – 1.00)                         | 0.05                 |
| Impact III body image                                                                                | 71 (15)                | 69 (16)                                           | 75 (11)                                            | 0.20                 | 1.03 (0.99 - 1.07)  | 0.15                 | 1.03 (0.99 - 1.07)                        | 0.12                 |
| <b>Quality of life obtained in patients aged ≥18 with SIBDQ, mean (SD), N=419</b>                    |                        |                                                   |                                                    |                      |                     |                      |                                           |                      |
| SIBDQ total score                                                                                    | 53 (11)                | 55 (11)                                           | 52 (11)                                            | <b>0.001</b>         | 0.98 (0.96 - 0.99)  | <b>0.006</b>         | 0.98 (0.96 - 0.99)                        | <b>0.009</b>         |
| Systemic Systems                                                                                     | 5 (1)                  | 5 (1)                                             | 5 (1)                                              | <b>0.0008</b>        | 0.78 (0.67 - 0.90)  | <b>0.001</b>         | 0.80 (0.68 - 0.92)                        | <b>0.003</b>         |
| Social Function                                                                                      | 6 (1)                  | 6 (1)                                             | 6 (1)                                              | 0.6976               | 1.01 (0.87 - 1.18)  | 0.85                 | 1.01 (0.86 - 1.18)                        | 0.94                 |
| Bowel Systems                                                                                        | 6 (1)                  | 6 (1)                                             | 5 (1)                                              | <b>0.0054</b>        | 0.84 (0.72 - 0.98)  | <b>0.02</b>          | 0.82 (0.70 - 0.96)                        | <b>0.01</b>          |
| Emotion Health                                                                                       | 5 (1)                  | 5 (1)                                             | 5 (1)                                              | <b>0.0003</b>        | 0.77 (0.66 - 0.89)  | <b>0.0005</b>        | 0.78 (0.67 - 0.91)                        | <b>0.002</b>         |
| <b>Perceived Stress assessed by the mother of pediatric patients using PSQ, mean (95%CI), N=81</b>   |                        |                                                   |                                                    |                      |                     |                      |                                           |                      |
| PSQ Total Score                                                                                      | 42 (38 - 46)           | 41 (36 - 46)                                      | 43 (37 - 50)                                       | 0.60                 | 1.006 (0.98 - 1.04) | 0.64                 | 1.01 (0.98 - 1.04)                        | 0.47                 |
| PSQ Worries                                                                                          | 30 (26 - 35)           | 30 (24 - 36)                                      | 31 (26 - 37)                                       | 0.47                 | 1.003 (0.98 - 1.03) | 0.78                 | 1.00 (0.98 - 1.03)                        | 0.72                 |
| PSQ Tension                                                                                          | 42 (37 - 47)           | 41 (36 - 47)                                      | 43 (34 - 53)                                       | 0.96                 | 1.004 (0.98 - 1.03) | 0.73                 | 1.01 (0.98 - 1.03)                        | 0.53                 |
| PSQ Joy                                                                                              | 54 (50 - 59)           | 54 (49 - 60)                                      | 54 (45 - 63)                                       | 0.96                 | 1.00 (0.98 - 1.02)  | 0.98                 | 1.00 (0.97 - 1.02)                        | 0.77                 |
| PSQ Demands                                                                                          | 50 (45 - 54)           | 49 (43 - 55)                                      | 52 (45 - 60)                                       | 0.49                 | 1.008 (0.99 - 1.03) | 0.50                 | 1.01 (0.99 - 1.04)                        | 0.30                 |

| Factors, N (row %)                                                                | Total cohort,<br>N=501 | Low perceived risk<br>(rating ≤ 3)<br>n=320 (64%) | High perceived risk<br>(rating > 3)<br>n=181 (36%) | p-value <sup>a</sup> | Crude OR (95%CI)      | p-value <sup>b</sup> | OR adjusted for age<br>and gender (95%CI) | p-value <sup>c</sup> |
|-----------------------------------------------------------------------------------|------------------------|---------------------------------------------------|----------------------------------------------------|----------------------|-----------------------|----------------------|-------------------------------------------|----------------------|
| <b>Perceived Stress assessed by adult patients using PSQ, mean (95%CI), N=393</b> |                        |                                                   |                                                    |                      |                       |                      |                                           |                      |
| PSQ Total Score                                                                   | 37 (34 - 39)           | 33 (31 - 36)                                      | 42 (39 - 45)                                       | <b>&lt;0.0001</b>    | 1.02 (1.01 - 1.03)    | <b>&lt;0.0001</b>    | 1.02 (1.009 - 1.03)                       | <b>0.0003</b>        |
| PSQ Worries                                                                       | 28 (26 - 30)           | 24 (22 - 27)                                      | 33 (29 - 37)                                       | <b>0.0004</b>        | 1.02 (1.01 - 1.03)    | <b>0.0001</b>        | 1.02 (1.007 - 1.03)                       | <b>0.0007</b>        |
| PSQ Tension                                                                       | 40 (37 - 42)           | 36 (33 - 40)                                      | 46 (42 - 50)                                       | <b>0.0003</b>        | 1.02 (1.01 - 1.02)    | <b>0.0003</b>        | 1.01 (1.005 - 1.02)                       | <b>0.001</b>         |
| PSQ Joy                                                                           | 59 (56 - 61)           | 61 (58 - 64)                                      | 54 (50 - 58)                                       | <b>0.007</b>         | 0.989 (0.981 - 0.997) | <b>0.009</b>         | 0.989 (0.981 - 0.997)                     | <b>0.01</b>          |
| PSQ Demands                                                                       | 38 (36 - 40)           | 35 (32 - 38)                                      | 43 (40 - 47)                                       | <b>0.0002</b>        | 1.02 (1.01 - 1.02)    | <b>0.0007</b>        | 1.01 (1.00 - 1.02)                        | <b>0.004</b>         |

Results were presented in frequency (n) and row percentage (%) for categorical variables, mean with 95% confidence intervals (95% CI), mean with standard deviation (SD) or median with interquartile range (IQR) for continuous variables as appropriate.

Crude odds ratios (OR) with 95% CI obtained from the univariate logistic regression model are given.

Adjusted OR resulted from the same logistic regression model as the univariate analysis adjusted for age and gender.

<sup>a</sup> P-values refer to the comparison between group with low perceived risk (rating ≤ 3) versus group with high perceived risk (rating >3) obtained by Mann-Whitney-U-test for continuous variables, Pearson's Chi-square test, or Fisher's exact test for categorical variables, where applicable.

<sup>b</sup> P-values calculated from the Wald Chi-Square Test for the significance of crude OR.

<sup>c</sup> P-values calculated from the Wald Chi-Square Test for the significance of adjusted OR.

<sup>d</sup> SIRSCO (Scoring for increased risk for severe COVID-19 outcome) was described in Methods 2.3 and S2.

PSQ, Perceived stress questionnaire; SIBDQ, Short Inflammatory Bowel Disease Questionnaire

Bold p-values indicate statistically significant results with a p-value ≤ 0.05.

**Supplementary Table S3: Univariate analysis of factors associated with high perceived harm in case of COVID-19 infection, N=501**

| Factors, N (row %)                                  | Total cohort, N=501 | Low perceived harm (rating ≤ 3) n=123 (25%) | High perceived harm (rating > 3) n=378 (75%) | p-value <sup>a</sup> | Crude OR (95%CI)   | p-value <sup>b</sup> | OR adjusted for age and gender (95%CI) | p-value <sup>c</sup> |
|-----------------------------------------------------|---------------------|---------------------------------------------|----------------------------------------------|----------------------|--------------------|----------------------|----------------------------------------|----------------------|
| <b>Age in years, median (IQR)</b>                   | 40 (27 – 54)        | 34 (22-48)                                  | 42 (29 – 55)                                 | <b>0.0006</b>        | 1.02 (1.01 – 1.03) | <b>0.002</b>         |                                        |                      |
| <b>Age groups</b>                                   |                     |                                             |                                              | <b>0.02</b>          |                    |                      |                                        |                      |
| 6 – 20                                              | 90                  | 27 (30%)                                    | 63 (70%)                                     |                      | 0.57 (0.34 – 0.99) | <b>0.04</b>          |                                        |                      |
| >20 – 40                                            | 167                 | 51 (31%)                                    | 116 (69%)                                    |                      | 0.56 (0.38 – 0.81) | <b>0.002</b>         |                                        |                      |
| >40 – 60                                            | 173                 | 31 (18%)                                    | 142 (82%)                                    |                      | 1.13 (0.78 – 1.62) | 0.53                 |                                        |                      |
| >60                                                 | 71                  | 14 (20%)                                    | 57 (80%)                                     |                      | 1                  |                      |                                        |                      |
| <b>Gender</b>                                       |                     |                                             |                                              | 0.72                 |                    |                      |                                        |                      |
| Female                                              | 231                 | 55 (24%)                                    | 176 (76%)                                    |                      | 1                  |                      |                                        |                      |
| Male                                                | 270                 | 68 (25%)                                    | 202 (75%)                                    |                      | 0.93 (0.64 – 1.33) | 0.69                 |                                        |                      |
| <b>Living in Munich</b>                             |                     |                                             |                                              | 0.62                 |                    |                      |                                        |                      |
| Yes                                                 | 174                 | 45 (26%)                                    | 129 (74%)                                    |                      | 1                  |                      | 1                                      |                      |
| No                                                  | 327                 | 78 (24%)                                    | 249 (76%)                                    |                      | 1.11 (0.75 – 1.63) | 0.58                 | 1.13 (0.76 – 1.66)                     | 0.52                 |
| <b>Housing space per person</b>                     |                     |                                             |                                              | 0.73                 |                    |                      |                                        |                      |
| ≤30m <sup>2</sup> – small space                     | 140                 | 31 (22%)                                    | 109 (78%)                                    |                      | 1                  |                      | 1                                      |                      |
| 30m <sup>2</sup> to 55m <sup>2</sup> – medium space | 239                 | 59 (25%)                                    | 180 (75%)                                    |                      | 0.87 (0.55 – 1.35) | 0.54                 | 0.76 (0.48 – 1.19)                     | 0.24                 |
| >55m <sup>2</sup> – large space                     | 118                 | 31 (26%)                                    | 87 (74%)                                     |                      | 0.8 (0.5 – 1.26)   | 0.34                 | 0.61 (0.37 – 0.98)                     | <b>0.047</b>         |
| <b>Number of household members</b>                  |                     |                                             |                                              | 0.40                 |                    |                      |                                        |                      |
| 1 to 2                                              | 254                 | 58 (23%)                                    | 196 (77%)                                    |                      | 1                  |                      | 1                                      |                      |
| ≥3                                                  | 245                 | 64 (26%)                                    | 181 (74%)                                    |                      | 0.84 (0.58 – 1.19) | 0.33                 | 1.15 (0.78 – 1.7)                      | 0.47                 |
| <b>Employment status</b>                            |                     |                                             |                                              | 0.71                 |                    |                      |                                        |                      |
| Employed                                            | 314                 | 74 (24%)                                    | 240 (76%)                                    |                      | 0.87 (0.59 – 1.27) | 0.46                 | 1.2 (0.78 – 1.83)                      | 0.41                 |
| Self-employed                                       | 31                  | 8 (26%)                                     | 23 (74%)                                     |                      | 0.77 (0.41 – 1.48) | 0.41                 | 1.03 (0.54 – 2.03)                     | 0.94                 |
| Not working                                         | 95                  | 20 (21%)                                    | 75 (79%)                                     |                      | 1                  |                      | 1                                      |                      |
| <b>Net family income</b>                            |                     |                                             |                                              | 0.2                  |                    |                      |                                        |                      |
| ≤2500 €                                             | 105                 | 27 (26%)                                    | 78 (74%)                                     |                      | 1.31 (0.8 – 2.18)  | 0.29                 | 1.03 (0.62 – 1.75)                     | 0.91                 |
| 2500 to 4000 €                                      | 109                 | 22 (20%)                                    | 87 (80%)                                     |                      | 1.79 (1.2 – 2.71)  | <b>0.005</b>         | 1.53 (1.01 – 2.34)                     | <b>0.046</b>         |
| 4000 to 6000 €                                      | 114                 | 22 (19%)                                    | 92 (81%)                                     |                      | 1.89 (1.32 – 2.73) | <b>0.0005</b>        | 1.88 (1.31 – 2.72)                     | <b>0.001</b>         |
| >6000 €                                             | 77                  | 24 (31%)                                    | 53 (69%)                                     |                      | 1                  |                      | 1                                      |                      |
| <b>Level of education</b>                           |                     |                                             |                                              | 0.74                 |                    |                      |                                        |                      |
| <12 years education                                 | 201                 | 50 (25%)                                    | 151 (75%)                                    |                      | 1                  |                      | 1                                      |                      |
| ≥12 years education                                 | 283                 | 69 (24%)                                    | 214 (76%)                                    |                      | 1.03 (0.7 – 1.48)  | 0.89                 | 1.28 (0.86 – 1.89)                     | 0.22                 |
| <b>Risk employment for COVID-19 infection</b>       |                     |                                             |                                              | 0.78                 |                    |                      |                                        |                      |
| Yes                                                 | 209                 | 50 (24%)                                    | 159 (76%)                                    |                      | 1.06 (0.74 – 1.54) | 0.76                 | 1.17 (0.81 – 1.71)                     | 0.42                 |
| No                                                  | 292                 | 73 (25%)                                    | 219 (75%)                                    |                      | 1                  |                      | 1                                      |                      |
| <b>Public transport usage reduced</b>               |                     |                                             |                                              | <b>0.03</b>          |                    |                      |                                        |                      |
| No                                                  | <b>59</b>           | <b>22 (37%)</b>                             | <b>37 (63%)</b>                              |                      | 1                  |                      | 1                                      |                      |
| Yes                                                 | <b>291</b>          | <b>62 (21%)</b>                             | <b>229 (79%)</b>                             |                      | 2.2 (1.23 – 3.83)  | <b>0.006</b>         | 2.53 (1.4 – 4.48)                      | <b>0.002</b>         |
| Does not concern me                                 | <b>148</b>          | <b>38 (26%)</b>                             | <b>110 (74%)</b>                             |                      | 1.72 (0.96 – 3.02) | 0.06                 | 1.84 (1.02 – 3.28)                     | <b>0.04</b>          |

| Factors, N (row %)                                                           | Total cohort,<br>N=501 | Low perceived harm<br>(rating ≤ 3)<br>n=123 (25%) | High perceived harm<br>(rating > 3)<br>n=378 (75%) | p-value <sup>a</sup> | Crude OR (95%CI)   | p-value <sup>b</sup> | OR adjusted for<br>age and gender<br>(95%CI) | p-value <sup>c</sup> |
|------------------------------------------------------------------------------|------------------------|---------------------------------------------------|----------------------------------------------------|----------------------|--------------------|----------------------|----------------------------------------------|----------------------|
| <b>Temporary incapacity to work since 03/20</b>                              |                        |                                                   |                                                    | 0.80                 |                    |                      |                                              |                      |
| No                                                                           | 304                    | 72 (24%)                                          | 232 (76%)                                          |                      | 1                  |                      | 1                                            |                      |
| Yes, due to IBD or other reasons                                             | 111                    | 25 (23%)                                          | 86 (77%)                                           |                      | 1.07 (0.67 – 1.76) | 0.79                 | 1.12 (0.7 – 1.86)                            | 0.65                 |
| <b>BMI</b>                                                                   |                        |                                                   |                                                    | 0.27                 |                    |                      |                                              |                      |
| Underweight                                                                  | 40                     | 11 (28%)                                          | 29 (73%)                                           |                      | 0.97 (0.49 – 2.08) | 0.94                 | 1.24 (0.61 – 2.68)                           | 0.57                 |
| Normal weight                                                                | 275                    | 74 (27%)                                          | 201 (73%)                                          |                      | 1                  |                      | 1                                            |                      |
| Overweight                                                                   | 128                    | 28 (22%)                                          | 100 (78%)                                          |                      | 1.32 (0.97 – 1.79) | 0.08                 | 1.15 (0.83 – 1.59)                           | 0.40                 |
| Obesity                                                                      | 57                     | 9 (16%)                                           | 48 (84%)                                           |                      | 1.96 (1.33 – 2.97) | <b>0.001</b>         | 1.58 (1.05 – 2.43)                           | <b>0.03</b>          |
| <b>IBD Type</b>                                                              |                        |                                                   |                                                    | 0.32                 |                    |                      |                                              |                      |
| Crohn's Disease                                                              | 295                    | 66 (22%)                                          | 229 (78%)                                          |                      | 1.24 (0.87 – 1.77) | 0.24                 | 1.17 (0.82 – 1.68)                           | 0.39                 |
| Ulcerative Colitis / IBD-u                                                   | 198                    | 52 (26%)                                          | 146 (74%)                                          |                      | 1                  |                      | 1                                            |                      |
| <b>Disease activity (self-assessment)</b>                                    |                        |                                                   |                                                    | 0.11                 |                    |                      |                                              |                      |
| Remission                                                                    | 228                    | 65 (29%)                                          | 163 (71%)                                          |                      | 1                  |                      | 1                                            |                      |
| Mild activity                                                                | 197                    | 39 (20%)                                          | 158 (80%)                                          |                      | 1.62 (1.1 – 2.36)  | <b>0.01</b>          | 1.57 (1.07 – 2.3)                            | <b>0.02</b>          |
| Moderate / severe activity                                                   | 75                     | 18 (24%)                                          | 57 (76%)                                           |                      | 1.26 (0.83 – 1.93) | 0.28                 | 1.14 (0.75 – 1.76)                           | 0.54                 |
| <b>Duration of IBD (to 2020)</b>                                             |                        |                                                   |                                                    | 0.30                 |                    |                      |                                              |                      |
| 0 to 5 years                                                                 | 126                    | 35 (28%)                                          | 91 (72%)                                           |                      | 1                  |                      | 1                                            |                      |
| 6 to 10 years                                                                | 93                     | 23 (25%)                                          | 70 (75%)                                           |                      | 1.17 (0.7 – 1.95)  | 0.55                 | 1.07 (0.63 – 1.79)                           | 0.81                 |
| 11 to 20 years                                                               | 147                    | 38 (26%)                                          | 109 (74%)                                          |                      | 1.1 (0.7 – 1.71)   | 0.66                 | 0.75 (0.46 – 1.2)                            | 0.23                 |
| over 20 years                                                                | 122                    | 22 (18%)                                          | 100 (82%)                                          |                      | 1.75 (1.1 – 2.73)  | <b>0.02</b>          | 0.84 (0.48 – 1.46)                           | 0.54                 |
| <b>Influenza vaccination</b>                                                 |                        |                                                   |                                                    | 0.16                 |                    |                      |                                              |                      |
| Yes                                                                          | 203                    | 41 (20%)                                          | 162 (80%)                                          |                      | 1.51 (1.03 – 2.25) | <b>0.04</b>          | 1.39 (0.95 – 2.08)                           | 0.10                 |
| No                                                                           | 293                    | 81 (28%)                                          | 212 (72%)                                          |                      | 1                  |                      | 1                                            |                      |
| <b>Any immunosuppressive medications used incl. IMM, biologics, steroids</b> |                        |                                                   |                                                    | <b>&lt;.001</b>      |                    |                      |                                              |                      |
| Yes                                                                          | 399                    | 84 (21%)                                          | 315 (79%)                                          |                      | 2.32 (1.6 – 3.37)  | <b>&lt;0.0001</b>    | 2.44 (1.67 – 3.58)                           | <b>&lt;0.0001</b>    |
| No                                                                           | 102                    | 39 (38%)                                          | 63 (62%)                                           |                      | 1                  |                      | 1                                            |                      |
| <b>Infliximab (i.e., Remicade, Remsima, Flixabi, Inflectra, Zessly)</b>      |                        |                                                   |                                                    | 0.91                 |                    |                      |                                              |                      |
| Yes                                                                          | 165                    | 41 (25%)                                          | 124 (75%)                                          |                      | 0.98 (0.66 – 1.46) | 0.91                 | 1.1 (0.74 – 1.65)                            | 0.66                 |
| No                                                                           | 336                    | 82 (24%)                                          | 254 (76%)                                          |                      | 1                  |                      | 1                                            |                      |
| <b>High-risk comorbidity</b>                                                 |                        |                                                   |                                                    | 0.08                 |                    |                      |                                              |                      |
| No high-risk comorbidity                                                     | 289                    | 82 (28%)                                          | 207 (72%)                                          |                      | 1                  |                      | 1                                            |                      |
| One high risk comorbidity                                                    | 132                    | 28 (21%)                                          | 104 (79%)                                          |                      | 1.47 (1 – 2.18)    | <b>0.05</b>          | 1.31 (0.88 – 1.97)                           | 0.19                 |
| Two high risk comorbidities                                                  | 45                     | 9 (20%)                                           | 36 (80%)                                           |                      | 1.59 (0.98 – 2.63) | 0.07                 | 1.29 (0.76 – 2.22)                           | 0.35                 |
| ≥3 high risk comorbidities                                                   | 35                     | 4 (11%)                                           | 31 (89%)                                           |                      | 3.07 (1.76 – 5.66) | <b>0.0002</b>        | 2.27 (1.21 – 4.44)                           | <b>0.01</b>          |
| <b>SIRSCO<sup>d</sup> index for severe COVID-19 course</b>                   |                        |                                                   |                                                    | <b>0.0006</b>        |                    |                      |                                              |                      |
| 0= no increased risk                                                         | 58                     | 21 (36%)                                          | 37 (64%)                                           |                      | 0.74 (0.42 – 1.32) | 0.29                 | 0.72 (0.41 – 1.30)                           | 0.26                 |
| 1= mild                                                                      | 248                    | 73 (29%)                                          | 175 (71%)                                          |                      | 1                  |                      |                                              |                      |
| 2= moderate                                                                  | 116                    | 17 (15%)                                          | 99 (85%)                                           |                      | 2.43 (1.72 – 3.49) | <b>&lt;0.0001</b>    | 2.28 (1.59 – 3.3)                            | <b>&lt;0.0001</b>    |
| ≥3 severe to very severe risk                                                | 79                     | 12 (15%)                                          | 67 (85%)                                           |                      | 2.33 (1.63 – 3.37) | <b>&lt;0.0001</b>    | 2.02 (1.33 – 3.09)                           | <b>0.001</b>         |
| <b>Sleep disturbances</b>                                                    |                        |                                                   |                                                    | <b>0.01</b>          |                    |                      |                                              |                      |
| Yes                                                                          | 112                    | 16 (14%)                                          | 96 (86%)                                           |                      | 2.24 (1.33 – 4.03) | <b>0.004</b>         | 2.16 (1.27 – 3.89)                           | <b>0.01</b>          |
| No                                                                           | 386                    | 105 (27%)                                         | 281 (73%)                                          |                      | 1                  |                      | 1                                            |                      |

| Factors, N (row %)                                                                                   | Total cohort,<br>N=501 | Low perceived harm<br>(rating ≤ 3)<br>n=123 (25%) | High perceived harm<br>(rating > 3)<br>n=378 (75%) | p-value <sup>a</sup> | Crude OR (95%CI)    | p-value <sup>b</sup> | OR adjusted for<br>age and gender<br>(95%CI) | p-value <sup>c</sup> |
|------------------------------------------------------------------------------------------------------|------------------------|---------------------------------------------------|----------------------------------------------------|----------------------|---------------------|----------------------|----------------------------------------------|----------------------|
| <b>Weight change</b>                                                                                 |                        |                                                   |                                                    |                      |                     |                      |                                              |                      |
|                                                                                                      |                        |                                                   |                                                    | <b>0.007</b>         |                     |                      |                                              |                      |
| Yes, intended                                                                                        | 71                     | 15 (21%)                                          | 56 (79%)                                           |                      | 1.54 (0.88 – 2.87)  | 0.15                 | 1.92 (1.08 – 3.62)                           | <b>0.03</b>          |
| Yes, unintended                                                                                      | 135                    | 21 (16%)                                          | 114 (84%)                                          |                      | 2.24 (1.58 – 3.25)  | <b>&lt;.0001</b>     | 2.15 (1.51 – 3.13)                           | <b>&lt;0.0001</b>    |
| Unchanged                                                                                            | 294                    | 86 (29%)                                          | 208 (71%)                                          |                      | 1                   |                      | 1                                            |                      |
| <b>Food intake since pandemic</b>                                                                    |                        |                                                   |                                                    |                      |                     |                      |                                              |                      |
|                                                                                                      |                        |                                                   |                                                    | 0.15                 |                     |                      |                                              |                      |
| More                                                                                                 | 72                     | 11 (15%)                                          | 61 (85%)                                           |                      | 1.93 (1.04 – 3.94)  | 0.05                 | 2.01 (1.07 – 4.13)                           | 0.04                 |
| Unchanged                                                                                            | 395                    | 102 (26%)                                         | 293 (74%)                                          |                      | 1                   |                      | 1                                            |                      |
| Less                                                                                                 | 33                     | 9 (27%)                                           | 24 (73%)                                           |                      | 0.93 (0.59 – 1.51)  | 0.76                 | 0.96 (0.6 – 1.57)                            | 0.87                 |
| <b>COVID-19 PCR for patient since 03/20</b>                                                          |                        |                                                   |                                                    |                      |                     |                      |                                              |                      |
|                                                                                                      |                        |                                                   |                                                    | 0.86                 |                     |                      |                                              |                      |
| Yes                                                                                                  | 117                    | 28 (24%)                                          | 89 (76%)                                           |                      | 1.04 (0.67 – 1.67)  | 0.85                 | 1.17 (0.75 – 1.89)                           | 0.51                 |
| No                                                                                                   | 384                    | 95 (25%)                                          | 289 (75%)                                          |                      | 1                   |                      | 1                                            |                      |
| <b>COVID-19 PCR for family member since 03/20</b>                                                    |                        |                                                   |                                                    |                      |                     |                      |                                              |                      |
|                                                                                                      |                        |                                                   |                                                    | 0.06                 |                     |                      |                                              |                      |
| Yes                                                                                                  | 99                     | 23 (23%)                                          | 76 (77%)                                           |                      | 1.07 (0.66 – 1.78)  | 0.80                 | 1.19 (0.73 – 2)                              | 0.51                 |
| No                                                                                                   | 398                    | 97 (24%)                                          | 301 (76%)                                          |                      | 1                   |                      | 1                                            |                      |
| <b>Appointment declined by hospital</b>                                                              |                        |                                                   |                                                    |                      |                     |                      |                                              |                      |
|                                                                                                      |                        |                                                   |                                                    | 0.11                 |                     |                      |                                              |                      |
| Yes, at least once                                                                                   | 46                     | 8 (17%)                                           | 38 (83%)                                           |                      | 1.41 (0.68 – 3.32)  | 0.39                 | 1.31 (0.62 – 3.09)                           | 0.51                 |
| No, I could schedule all requested appointments                                                      | 323                    | 74 (23%)                                          | 249 (77%)                                          |                      | 1                   |                      | 1                                            |                      |
| I haven't asked for new appointment                                                                  | 130                    | 40 (31%)                                          | 90 (69%)                                           |                      | 0.67 (0.5 – 0.89)   | <b>0.005</b>         | 0.67 (0.5 – 0.89)                            | <b>0.006</b>         |
| <b>Appointment postponed</b>                                                                         |                        |                                                   |                                                    |                      |                     |                      |                                              |                      |
|                                                                                                      |                        |                                                   |                                                    | <b>0.001</b>         |                     |                      |                                              |                      |
| Yes                                                                                                  | 133                    | 19 (14%)                                          | 114 (86%)                                          |                      | 2.37 (1.46 – 4.07)  | <b>0.0009</b>        | 2.29 (1.4 – 3.94)                            | <b>0.002</b>         |
| No (all reasons)                                                                                     | 367                    | 104 (28%)                                         | 263 (72%)                                          |                      | 1                   |                      | 1                                            |                      |
| <b>Interest in future telemedicine</b>                                                               |                        |                                                   |                                                    |                      |                     |                      |                                              |                      |
|                                                                                                      |                        |                                                   |                                                    | 0.55                 |                     |                      |                                              |                      |
| Yes                                                                                                  | 247                    | 58 (23%)                                          | 189 (77%)                                          |                      | 1.13 (0.8 – 1.62)   | 0.49                 | 1.18 (0.83 – 1.71)                           | 0.36                 |
| No                                                                                                   | 252                    | 65 (26%)                                          | 187 (74%)                                          |                      | 1                   |                      | 1                                            |                      |
| <b>Quality of life obtained in pediatric patients with Impact III Questionnaire, mean (SD), N=66</b> |                        |                                                   |                                                    |                      |                     |                      |                                              |                      |
| Impact III total score                                                                               | 77 (14)                | 76 (15)                                           | 77 (14)                                            | 0.97                 | 1.004 (0.95 – 1.06) | 0.88                 | 1.01 (0.96 – 1.07)                           | 0.64                 |
| Impact III well being                                                                                | 63 (18)                | 63 (21)                                           | 64 (16)                                            | 0.91                 | 1.004 (0.97 – 1.04) | 0.81                 | 1.02 (0.97 – 1.06)                           | 0.45                 |
| Impact III emotion                                                                                   | 87 (11)                | 88 (12)                                           | 86 (11)                                            | 0.98                 | 1.003 (0.97 – 1.03) | 0.85                 | 0.998 (0.97 – 1.03)                          | 0.92                 |
| Impact III social                                                                                    | 71 (15)                | 68 (16)                                           | 72 (14)                                            | 0.37                 | 0.98 (0.93 – 1.03)  | 0.45                 | 0.99 (0.94 – 1.04)                           | 0.63                 |
| Impact III body image                                                                                | 76 (10)                | 76 (11)                                           | 76 (10)                                            | 0.22                 | 1.02 (0.99 – 1.06)  | 0.23                 | 1.03 (0.99 – 1.07)                           | 0.14                 |
| <b>Quality of life obtained in patients aged ≥18 with SIBDQ, mean (SD), N=419</b>                    |                        |                                                   |                                                    |                      |                     |                      |                                              |                      |
| SIBDQ total score                                                                                    | 53 (11)                | 56 (11)                                           | 53 (11)                                            | <b>0.0008</b>        | 0.97 (0.95 – 0.99)  | <b>0.005</b>         | 0.97 (0.95 – 0.99)                           | <b>0.01</b>          |
| Systemic Systems                                                                                     | 5 (1)                  | 6 (1)                                             | 5 (1)                                              | <b>0.0006</b>        | 0.74 (0.61 – 0.88)  | <b>0.001</b>         | 0.74 (0.61 – 0.89)                           | <b>0.001</b>         |
| Social Function                                                                                      | 6 (1)                  | 6 (1)                                             | 6 (1)                                              | <b>0.04</b>          | 0.87 (0.71 – 1.04)  | 0.15                 | 0.89 (0.73 – 1.07)                           | 0.24                 |
| Bowel Systems                                                                                        | 6 (1)                  | 6 (1)                                             | 6 (1)                                              | <b>0.05</b>          | 0.86 (0.71 – 1.03)  | 0.10                 | 0.88 (0.73 – 1.06)                           | 0.18                 |
| Emotion Health                                                                                       | 5 (1)                  | 5 (1)                                             | 5 (1)                                              | <b>0.001</b>         | 0.74 (0.61 – 0.89)  | <b>0.001</b>         | 0.73 (0.6 – 0.88)                            | <b>0.001</b>         |
| <b>Perceived Stress assessed by the mother of pediatric patients using PSQ, mean (95%CI), N=81</b>   |                        |                                                   |                                                    |                      |                     |                      |                                              |                      |
| PSQ Total Score                                                                                      | 42 (38 – 46)           | 40 (33 – 47)                                      | 43 (38 – 47)                                       | 0.74                 | 1.01 (0.98 – 1.04)  | 0.58                 | 1.01 (0.98 – 1.04)                           | 0.44                 |
| PSQ Worries                                                                                          | 30 (26 – 35)           | 28 (20 – 36)                                      | 31 (26 – 37)                                       | 0.55                 | 1.01 (0.98 – 1.04)  | 0.50                 | 1.01 (0.98 – 1.04)                           | 0.60                 |
| PSQ Tension                                                                                          | 42 (37 – 47)           | 39 (30 – 47)                                      | 43 (37 – 49)                                       | 0.49                 | 1.01 (0.99 – 1.03)  | 0.40                 | 1.01 (0.99 – 1.04)                           | 0.38                 |

| Factors, N (row %)                                                                | Total cohort,<br>N=501 | Low perceived harm<br>(rating ≤ 3)<br>n=123 (25%) | High perceived harm<br>(rating > 3)<br>n=378 (75%) | p-value <sup>a</sup> | Crude OR (95%CI)      | p-value <sup>b</sup> | OR adjusted for<br>age and gender<br>(95%CI) | p-value <sup>c</sup> |
|-----------------------------------------------------------------------------------|------------------------|---------------------------------------------------|----------------------------------------------------|----------------------|-----------------------|----------------------|----------------------------------------------|----------------------|
| PSQ Joy                                                                           | 54 (50 – 59)           | 56 (48 – 63)                                      | 54 (48 – 60)                                       | 0.76                 | 0.995 (0.973 – 1.017) | 0.66                 | 0.99 (0.97 – 1.01)                           | 0.44                 |
| PSQ Demands                                                                       | 50 (45 – 54)           | 49 (38 – 59)                                      | 51 (46 – 56)                                       | 0.77                 | 1.01 (0.98 – 1.03)    | 0.70                 | 1.01 (0.99 – 1.04)                           | 0.40                 |
| <b>Perceived Stress assessed by adult patients using PSQ, mean (95%CI), N=393</b> |                        |                                                   |                                                    |                      |                       |                      |                                              |                      |
| PSQ Total Score                                                                   | 37 (34 – 39)           | 30 (26 – 34)                                      | 39 (36 – 41)                                       | <b>0.0007</b>        | 1.02 (1.01 – 1.04)    | <b>0.0004</b>        | 1.03 (1.01 – 1.04)                           | <b>0.0001</b>        |
| PSQ Worries                                                                       | 28 (26 – 30)           | 20 (17 – 24)                                      | 30 (28 – 33)                                       | <b>&lt;.0001</b>     | 1.03 (1.01 – 1.04)    | <b>&lt;.0001</b>     | 1.03 (1.02 – 1.04)                           | <b>&lt;0.0001</b>    |
| PSQ Tension                                                                       | 40 (37 – 42)           | 35 (30 – 39)                                      | 42 (39 – 45)                                       | <b>0.03</b>          | 1.011 (1.002 – 1.02)  | <b>0.02</b>          | 1.013 (1.003 – 1.023)                        | <b>0.01</b>          |
| PSQ Joy                                                                           | 59 (56 – 61)           | 67 (62 – 72)                                      | 56 (53 – 59)                                       | <b>0.0002</b>        | 0.98 (0.97 – 0.99)    | <b>0.0003</b>        | 0.98 (0.97 – 0.99)                           | <b>0.0003</b>        |
| PSQ Demands                                                                       | 38 (36 – 40)           | 33 (29 – 38)                                      | 40 (37 – 42)                                       | <b>0.02</b>          | 1.012 (1.002 – 1.02)  | <b>0.02</b>          | 1.015 (1.004 – 1.026)                        | <b>0.007</b>         |

Results were presented in frequency (n) and row percentage (%) for categorical variables, mean with 95% confidence intervals (95% CI), mean with standard deviation (SD) or median with interquartile range (IQR) for continuous variables as appropriate.

Crude odds ratios (OR) with 95% CI obtained from the univariate logistic regression model are given.

Adjusted OR resulted from the same logistic regression model as the univariate analysis adjusted for age (years) and gender.

<sup>a</sup> P-values refer to the comparison between group with low perceived harm (rating ≤ 3) versus group with high perceived harm (rating >3) obtained by Mann-Whitney-U-test for continuous variables, Pearson's Chi-square test, or Fisher's exact test for categorical variables, where applicable.

<sup>b</sup> P-values calculated from the Wald Chi-Square Test for the significance of crude OR.

<sup>c</sup> P-values calculated from the Wald Chi-Square Test for the significance of adjusted OR.

<sup>d</sup> SIRSCO (Scoring for increased risk for severe COVID-19 outcome) was described in Methods 2.3 and S2.

PSQ, Perceived stress questionnaire; SIBDQ, Short Inflammatory Bowel Disease Questionnaire

Bold p-values indicate statistically significant results with a p-value ≤ 0.05.

## Supplementary Table S4: Considered variables for multivariable logistic regression

A univariate logistic analysis was performed including all subjects to determine the associations between variables of interest and high perceived risk or high perceived harm. All statistically significant variables associated with high perceived risk or high perceived harm ( $p \leq 0.25$ ) in the univariate analysis were considered in the multivariable logistic regression. Reference category (ref.) was chosen according to clinician interest or as the most frequent category present in the considered variables.

| Domains                  | Variable of interest                                                                                                                                                                                                                                                                                                                                                                                                                                                                                                                                                                                                                                                                                                                                                                                                                                                                                                                                          |
|--------------------------|---------------------------------------------------------------------------------------------------------------------------------------------------------------------------------------------------------------------------------------------------------------------------------------------------------------------------------------------------------------------------------------------------------------------------------------------------------------------------------------------------------------------------------------------------------------------------------------------------------------------------------------------------------------------------------------------------------------------------------------------------------------------------------------------------------------------------------------------------------------------------------------------------------------------------------------------------------------|
| Demographics             | Age in years                                                                                                                                                                                                                                                                                                                                                                                                                                                                                                                                                                                                                                                                                                                                                                                                                                                                                                                                                  |
|                          | Gender, categorized in Male vs. Female (ref.)                                                                                                                                                                                                                                                                                                                                                                                                                                                                                                                                                                                                                                                                                                                                                                                                                                                                                                                 |
|                          | Living in Munich, categorized in Yes (ref.) vs. No                                                                                                                                                                                                                                                                                                                                                                                                                                                                                                                                                                                                                                                                                                                                                                                                                                                                                                            |
| Socio-economics          | Housing space per person, categorized in <ul style="list-style-type: none"> <li>small space (<math>\leq 30\text{m}^2</math> per person) (ref.)</li> <li>middle space (<math>30\text{m}^2</math> to <math>55\text{m}^2</math>)</li> <li>large space (<math>&gt;55\text{m}^2</math>)</li> </ul>                                                                                                                                                                                                                                                                                                                                                                                                                                                                                                                                                                                                                                                                 |
|                          | Number of family members per household, categorized in <ul style="list-style-type: none"> <li>1-2 persons per household (ref.)</li> <li><math>\geq 3</math> persons per household</li> </ul>                                                                                                                                                                                                                                                                                                                                                                                                                                                                                                                                                                                                                                                                                                                                                                  |
|                          | Current employment status, categorized in <ul style="list-style-type: none"> <li>Employed</li> <li>Self-employed</li> <li>Not working includes unemployed, retired, parental leave, sabbatical, students (ref.)</li> </ul>                                                                                                                                                                                                                                                                                                                                                                                                                                                                                                                                                                                                                                                                                                                                    |
|                          | Level of education according to the German school system, categorized in <ul style="list-style-type: none"> <li><math>&lt;12</math> years education (ref.)</li> <li><math>\geq 12</math> years education</li> </ul>                                                                                                                                                                                                                                                                                                                                                                                                                                                                                                                                                                                                                                                                                                                                           |
| COVID-19 related factors | High-risk job for COVID-19 infection was considered, if patients answered as employees in the healthcare sector (e.g., nursing home, hospital, general praxis), emergency service (e.g., fire department, police), airport and air traffic (pilots, flight attendants), public transport (e.g., bus driver, train attendant, subway driver), education (e.g., kindergarten, day care, school), sales (e.g., grocery store, hardware store, drugstore), social work and other employment involved contacts with people outside of their own families.<br>Answers: Yes vs. No (ref.)                                                                                                                                                                                                                                                                                                                                                                            |
|                          | Public transport usage reduced <ul style="list-style-type: none"> <li>No (ref.)</li> <li>Yes</li> <li>No need</li> </ul>                                                                                                                                                                                                                                                                                                                                                                                                                                                                                                                                                                                                                                                                                                                                                                                                                                      |
|                          | COVID-19 PCR for patient since 03/20: Yes vs. No (ref.)                                                                                                                                                                                                                                                                                                                                                                                                                                                                                                                                                                                                                                                                                                                                                                                                                                                                                                       |
|                          | COVID-19 PCR for family member since 03/20: Yes vs. No (ref.)                                                                                                                                                                                                                                                                                                                                                                                                                                                                                                                                                                                                                                                                                                                                                                                                                                                                                                 |
| Health conditions        | BMI ( $\text{kg}/\text{m}^2$ ) was calculated for all adult patients $\geq 20$ years, categorized in 4 nutrition status according to WHO. <ul style="list-style-type: none"> <li>Underweight for BMI <math>&lt; 18.5 \text{ kg}/\text{m}^2</math></li> <li>Normal weight for BMI in <math>18.5\text{--}24.9 \text{ kg}/\text{m}^2</math> (ref.)</li> <li>Overweight for BMI in <math>25.0\text{--}29.9 \text{ kg}/\text{m}^2</math></li> <li>Obesity for BMI <math>\geq 30 \text{ kg}/\text{m}^2</math></li> </ul> BMI Z-scores for all children aged $\geq 6$ to $<20$ was calculated based on WHO/CDC Growth chart 2000. Interpretation of cut-offs as follows <ul style="list-style-type: none"> <li>Underweight/Wasting <math>&lt;-1\text{SD}</math></li> <li>Normal weight: <math>\geq -1\text{SD}</math> and <math>&lt;+1\text{SD}</math></li> <li>Overweight: <math>\geq +1\text{SD}</math></li> <li>Obesity: <math>\geq +2\text{SD}</math></li> </ul> |
|                          | IBD Type: Crohn's Disease and Ulcerative Colitis / IBD-u (ref.)                                                                                                                                                                                                                                                                                                                                                                                                                                                                                                                                                                                                                                                                                                                                                                                                                                                                                               |
|                          | Disease activity (self-assessment) <ul style="list-style-type: none"> <li>Remission (ref.)</li> <li>Mild activity</li> <li>Moderate / severe activity</li> </ul>                                                                                                                                                                                                                                                                                                                                                                                                                                                                                                                                                                                                                                                                                                                                                                                              |
|                          | Duration of IBD (to 2020) <ul style="list-style-type: none"> <li>0 to 5 years (ref.)</li> <li>6 to 10 years</li> <li>11 to 20 years</li> <li>over 20 years</li> </ul>                                                                                                                                                                                                                                                                                                                                                                                                                                                                                                                                                                                                                                                                                                                                                                                         |

| Domains           | Variable of interest                                                                                                                                                                                                     |
|-------------------|--------------------------------------------------------------------------------------------------------------------------------------------------------------------------------------------------------------------------|
|                   | Influenza vaccination: Yes vs. No (ref.)                                                                                                                                                                                 |
|                   | Any immunosuppressive medications used incl. IM, biologics, steroids: Yes vs. No (ref.)                                                                                                                                  |
|                   | Infliximab (i.e., Remicade, Remsima, Flixabi, Inflectra, Zessly): Yes vs. No (ref.)                                                                                                                                      |
|                   | High-risk comorbidity (S2) <ul style="list-style-type: none"> <li>No high-risk comorbidity (ref.)</li> <li>One high risk comorbidity</li> <li>Two high risk comorbidities</li> <li>≥3 high risk comorbidities</li> </ul> |
|                   | SIRSCO index for severe COVID-19 (S2) <ul style="list-style-type: none"> <li>0= no increased risk</li> <li>1= mild risk (ref.)</li> <li>2= moderate risk</li> <li>≥3= severe to very severe risk</li> </ul>              |
| Lifestyle factors | Sleep disturbances since pandemic: Yes vs. No (ref.)                                                                                                                                                                     |
|                   | Weight change, independent if weight gain or weight loss. <ul style="list-style-type: none"> <li>Yes, intended</li> <li>Yes, unintended</li> <li>Unchanged (ref.)</li> </ul>                                             |
| Clinical care     | Appointment declined by hospital <ul style="list-style-type: none"> <li>Yes, at least once</li> <li>No, I could schedule all requested appointments (ref.)</li> <li>I haven't asked for new appointment</li> </ul>       |
|                   | Appointment postponed: Yes vs. No with all reasons (ref.)                                                                                                                                                                |
|                   | Interest in future telemedicine: Yes vs. No (ref.)                                                                                                                                                                       |

Employment status correlates significantly with net income per household ( $p < 0.0001$ ) and temporary incapacity to work since 3/20 ( $p = 0.004$ ). Due to missing data and to avoid multicollinearity, net income per household and temporary incapacity to work since 3/20 were excluded in the stepwise selection for multivariable logistic regression.

Food intake and weight change were highly significant correlated ( $p < 0.0001$ ). Food intake was excluded in the stepwise selection for multivariable logistic regression due to its possibly greater recall bias than weight change.
